# Supplementary material
Source: PubMed Central journal article supplement (PMC3999220)

Supporting Figure 1. Distribution of point-of-care C-reactive protein by tuberculosis status.

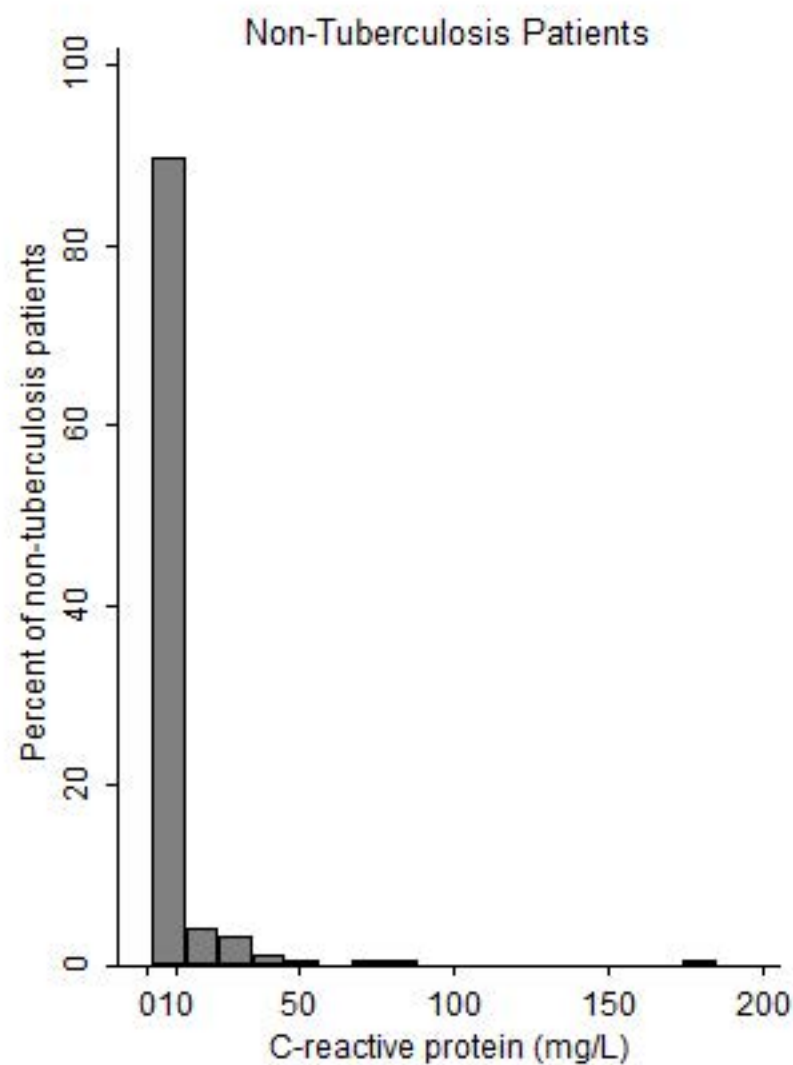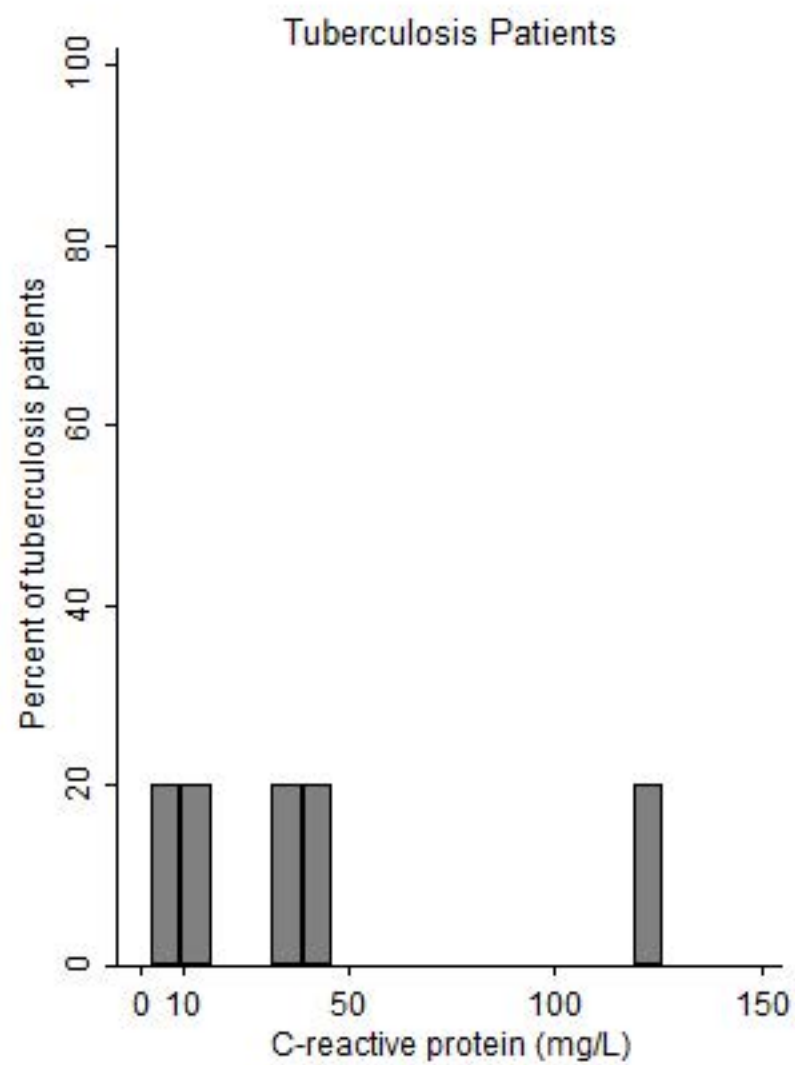

Supplement: NIHMS545619-supplement-Supplemental_Digital_Content_Fig_1.pdf [file NIHMS545619-supplement-Supplemental_Digital_Content_Fig_1.pdf]
